# Supplementary material for: Designing guanidine-based lead-free hybrid indium perovskites with highly efficient intrinsic broadband emissions
Source: Royal Society of Chemistry journal article supplement (doi:10.1039/d4tc00482e), 2024-01-01
Supplement: d4tc00482e1.pdf [file d4tc00482e1.pdf]

**Designing Guanidine-based Lead-free hybrid indium perovskites  
with highly efficient intrinsic broadband emissions**

*Chunqing Hou<sup>1</sup>, Xiaoting Liu<sup>2</sup>, Zisheng Wang<sup>1</sup>, Fan Yu<sup>1</sup>, Yang Yang<sup>1</sup>,  
Yilong Song<sup>1</sup>, Qingfeng Dong<sup>1\*</sup>*

<sup>1</sup> State Key Laboratory of Supramolecular Structure and Materials, College of  
Chemistry, Jilin University, Changchun 130012

<sup>2</sup> College of Energy Engineering, Shanxi College of Technology, Shuozhou 036000

#Equal contribution

\*Corresponding authors

Corresponding Author's Email Address: [qfdong@jlu.edu.cn](mailto:qfdong@jlu.edu.cn)

**Table S1.** Crystal data and structure refinement for (C<sub>13</sub>H<sub>14</sub>N<sub>3</sub>)<sub>3</sub>InBr<sub>6</sub> single crystal.

|                                             |                                                                                  |
|---------------------------------------------|----------------------------------------------------------------------------------|
| Compound                                    | (C <sub>13</sub> H <sub>14</sub> N <sub>3</sub> ) <sub>3</sub> InBr <sub>6</sub> |
| Chemical formula                            | C <sub>39</sub> H <sub>42</sub> Br <sub>6</sub> N <sub>9</sub> In                |
| Formula weight                              | 1239.09                                                                          |
| Temperature/K                               | 220                                                                              |
| Crystal system                              | Trigonal                                                                         |
| Space group                                 | R3                                                                               |
| a/Å                                         | 16.492(2)                                                                        |
| b/Å                                         | 16.492(2)                                                                        |
| c/Å                                         | 14.152(4)                                                                        |
| α/°                                         | 90                                                                               |
| β/°                                         | 90                                                                               |
| γ/°                                         | 120                                                                              |
| Volume/Å <sup>3</sup>                       | 3333.6(13)                                                                       |
| Z                                           | 3                                                                                |
| ρ <sub>calc</sub> /cm <sup>3</sup>          | 1.840                                                                            |
| μ/mm <sup>-1</sup>                          | 5.965                                                                            |
| F(000)                                      | 1794                                                                             |
| Radiation                                   | MoKα (λ = 0.71073)                                                               |
| 2θ range for data collection/°              | 6.39 to 55.066                                                                   |
| Index ranges                                | -19 ≤ h ≤ 21, -21 ≤ k ≤ 21, -18 ≤ l ≤ 18                                         |
| Reflections collected                       | 26582                                                                            |
| Independent reflections                     | 3408 [R(int) = 0.1134, R <sub>sigma</sub> = 0.0631]                              |
| Data/restraints/parameters                  | 3408 / 12 / 67                                                                   |
| Goodness-of-fit on F <sup>2</sup>           | 1.049                                                                            |
| Final R indexes [I ≥ 2σ (I)]                | R1 = 0.0723, wR2 = 0.1862                                                        |
| Final R indexes [all data]                  | R1 = 0.1494, wR2 = 0.2697                                                        |
| Largest diff. peak/hole / e.Å <sup>-3</sup> | 1.58/-1.36                                                                       |
| Flack parameter                             | 0.51(2)                                                                          |

**Table S2.** Selected Bond lengths (Å) and angles (°) for (C<sub>13</sub>H<sub>14</sub>N<sub>3</sub>)<sub>3</sub>InBr<sub>6</sub>.

|                                         |           |
|-----------------------------------------|-----------|
| Bond                                    | Distance  |
| In00-Br1 <sup>1</sup>                   | 2.671(4)  |
| In00-Br1 <sup>2</sup>                   | 2.670(4)  |
| In00-Br1                                | 2.671(4)  |
| In00-Br                                 | 2.687(4)  |
| In00-Br <sup>1</sup>                    | 2.687(4)  |
| In00-Br <sup>2</sup>                    | 2.687(4)  |
| Angle                                   | (°)       |
| Br1 <sup>1</sup> -In00-Br1 <sup>2</sup> | 92.08(17) |
| Br1 <sup>1</sup> -In00-Br1              | 92.08(17) |
| Br1 <sup>2</sup> -In00-Br1              | 92.08(17) |
| Br1 <sup>2</sup> -In00-Br <sup>1</sup>  | 179.5(2)  |
| Br1-In00-Br <sup>1</sup>                | 88.33(11) |

|                                        |           |
|----------------------------------------|-----------|
| Br1 <sup>2</sup> -In00-Br <sup>2</sup> | 88.11(11) |
| Br1 <sup>2</sup> -In00-Br              | 88.33(11) |
| Br1 <sup>1</sup> -In00-Br <sup>1</sup> | 88.11(11) |
| Br1-In00-Br <sup>2</sup>               | 179.5(2)  |
| Br1-In00-Br                            | 88.11(11) |
| Br1 <sup>1</sup> -In00-Br              | 179.5(2)  |
| Br1 <sup>1</sup> -In00-Br <sup>2</sup> | 88.33(11) |
| Br <sup>2</sup> -In00-Br               | 91.48(16) |
| Br <sup>1</sup> -In00-Br               | 91.48(16) |
| Br <sup>2</sup> -In00-Br <sup>1</sup>  | 92.08(17) |

**Table S3.** Atomic coordinates ( $\times 10^4$ ) and equivalent isotropic displacement parameters ( $\text{\AA}^2 \times 10^3$ ) for  $(\text{C}_{13}\text{H}_{14}\text{N}_3)_3\text{InBr}_6$ .

| Atom | x         | y        | z          | $U_{\text{(eq)}}$ |
|------|-----------|----------|------------|-------------------|
| In00 | 6666.67   | 3333.33  | 6735(4)    | 50.4(6)           |
| Br1  | 7302(2)   | 4879(2)  | 7784.4(14) | 56.6(11)          |
| Br   | 5759(2)   | 3974(2)  | 5667.7(12) | 54.8(10)          |
| C005 | 8380(20)  | 6758(19) | 5070(20)   | 70(7)             |
| N006 | 9296(15)  | 7542(15) | 5349(13)   | 71(4)             |
| C007 | 6825(14)  | 6453(10) | 3312(15)   | 80(2)             |
| C00D | 7380(13)  | 6145(12) | 3744(15)   | 80(2)             |
| C00G | 7207(14)  | 5240(13) | 3583(17)   | 80(2)             |
| C009 | 6479(15)  | 4644(10) | 2990(17)   | 80(2)             |
| C00K | 5924(13)  | 4952(12) | 2558(15)   | 80(2)             |
| C00A | 6098(13)  | 5856(13) | 2719(15)   | 80(2)             |
| C008 | 9929(16)  | 7036(11) | 6651(15)   | 80(2)             |
| C00B | 9623(14)  | 7629(13) | 6316(13)   | 80(2)             |
| C00H | 9906(15)  | 8481(12) | 6762(15)   | 80(2)             |
| C00J | 10494(15) | 8738(11) | 7543(15)   | 80(2)             |
| C00E | 10800(13) | 8144(13) | 7878(13)   | 80(2)             |
| C00C | 10518(15) | 7293(12) | 7432(15)   | 80(2)             |
| N1   | 8287(15)  | 6863(14) | 4146(15)   | 71(4)             |
| N2   | 7926(14)  | 6098(15) | 5646(14)   | 71(4)             |

**Table S4.** Anisotropic displacement parameters ( $\text{\AA}^2 \times 10^3$ ) for  $(\text{C}_{13}\text{H}_{14}\text{N}_3)_3\text{InBr}_6$ .

| Atom | $U^{11}$ | $U^{22}$ | $U^{33}$ | $U^{23}$ | $U^{13}$ | $U^{12}$ |
|------|----------|----------|----------|----------|----------|----------|
| In00 | 54.2(8)  | 54.2(8)  | 43.0(11) | 0        | 0        | 27.1(4)  |
| Br1  | 62(2)    | 61(2)    | 49(2)    | -5.7(18) | 3.4(18)  | 33(2)    |
| Br   | 62(2)    | 59(2)    | 45(2)    | -2.2(17) | -8.8(16) | 31(2)    |
| C005 | 99(17)   | 95(19)   | 65(13)   | -35(13)  | -26(12)  | 85(16)   |
| N006 | 76(10)   | 60(9)    | 71(9)    | 25(7)    | 23(7)    | 29(7)    |
| C007 | 76(5)    | 63(5)    | 108(6)   | -9(5)    | -29(4)   | 39(4)    |

|      |        |       |        |       |        |       |
|------|--------|-------|--------|-------|--------|-------|
| C00D | 76(5)  | 63(5) | 108(6) | -9(5) | -29(4) | 39(4) |
| C00G | 76(5)  | 63(5) | 108(6) | -9(5) | -29(4) | 39(4) |
| C009 | 76(5)  | 63(5) | 108(6) | -9(5) | -29(4) | 39(4) |
| C00K | 76(5)  | 63(5) | 108(6) | -9(5) | -29(4) | 39(4) |
| C00A | 76(5)  | 63(5) | 108(6) | -9(5) | -29(4) | 39(4) |
| C008 | 76(5)  | 63(5) | 108(6) | -9(5) | -29(4) | 39(4) |
| C00B | 76(5)  | 63(5) | 108(6) | -9(5) | -29(4) | 39(4) |
| C00H | 76(5)  | 63(5) | 108(6) | -9(5) | -29(4) | 39(4) |
| C00J | 76(5)  | 63(5) | 108(6) | -9(5) | -29(4) | 39(4) |
| C00E | 76(5)  | 63(5) | 108(6) | -9(5) | -29(4) | 39(4) |
| C00C | 76(5)  | 63(5) | 108(6) | -9(5) | -29(4) | 39(4) |
| N1   | 76(10) | 60(9) | 71(9)  | 25(7) | 23(7)  | 29(7) |
| N2   | 76(10) | 60(9) | 71(9)  | 25(7) | 23(7)  | 29(7) |

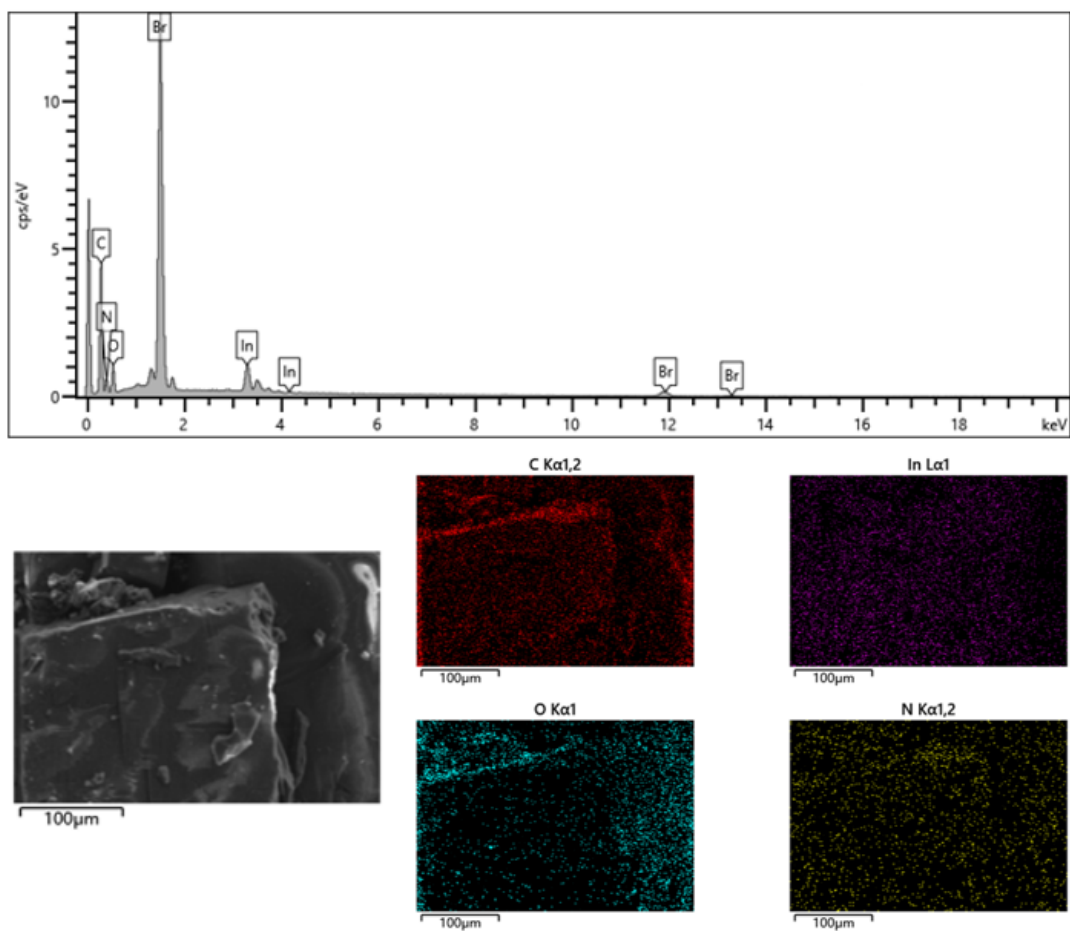

**Figure S1.** EDS spectrum of  $(C_{13}H_{14}N_3)_3InBr_6$ .

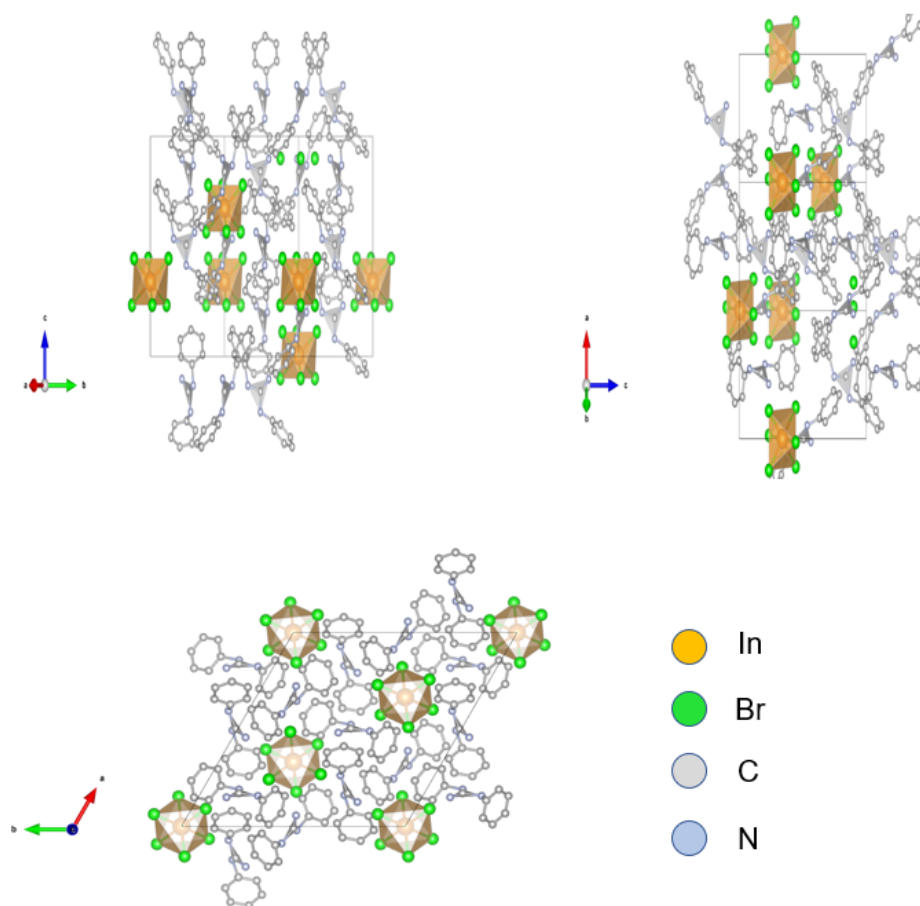

**Figure S2.** Single crystal structure of 0D  $(C_{13}H_{14}N_3)_3InBr_6$  from different viewing directions (brown, green, grey, blue spheres represent In, Br, C and N atoms, respectively).

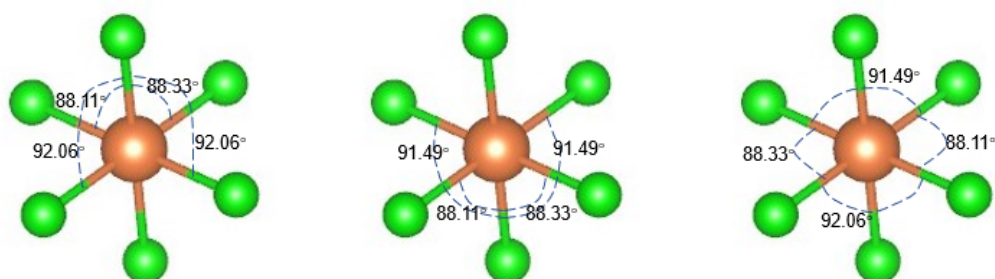

**Figure S3.** Bond angles of  $[InBr_6]^{3-}$  octahedron anion in  $(C_{13}H_{14}N_3)_3InBr_6$ .

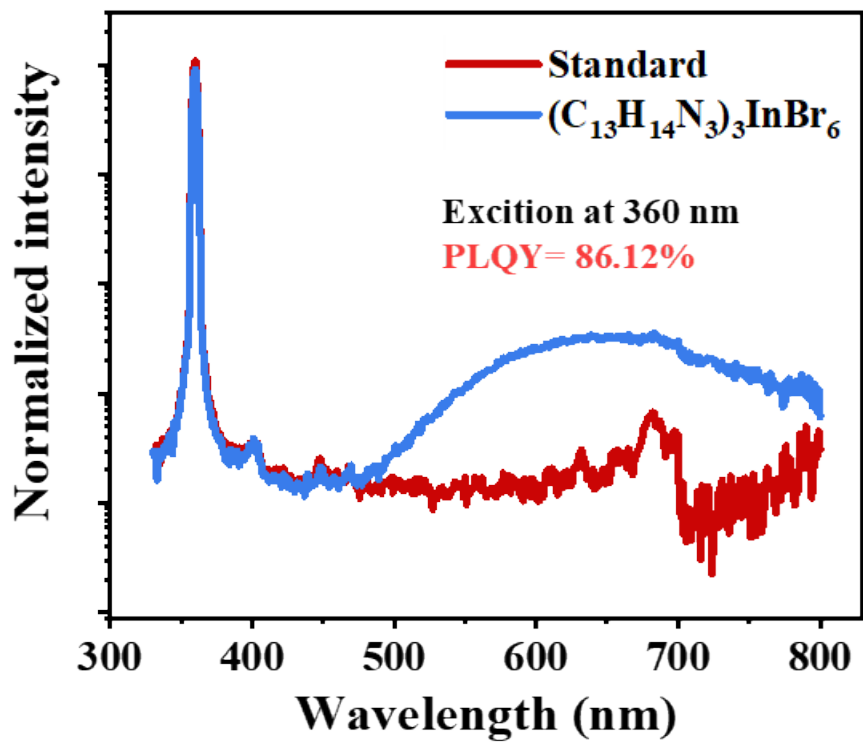

Figure S4. The PLQE curves of  $(C_{13}H_{14}N_3)_3InBr_6$ .

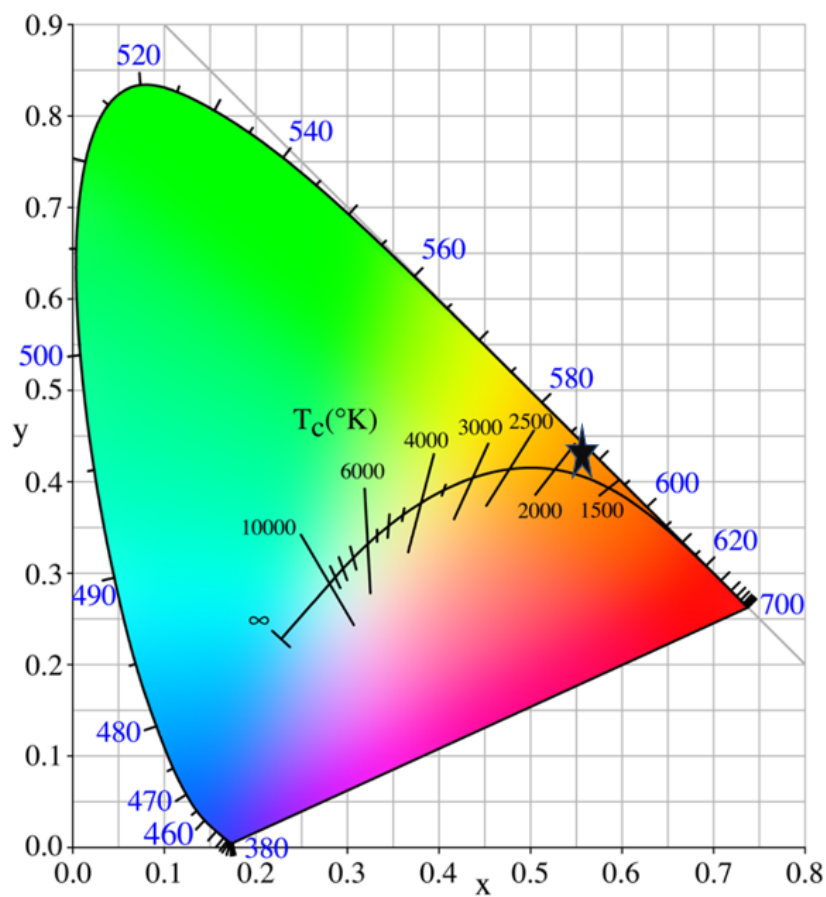

**Figure S5.** CIE chromaticity coordinates of  $(\text{C}_{13}\text{H}_{14}\text{N}_3)_3\text{InBr}_6$  single crystals (black star).

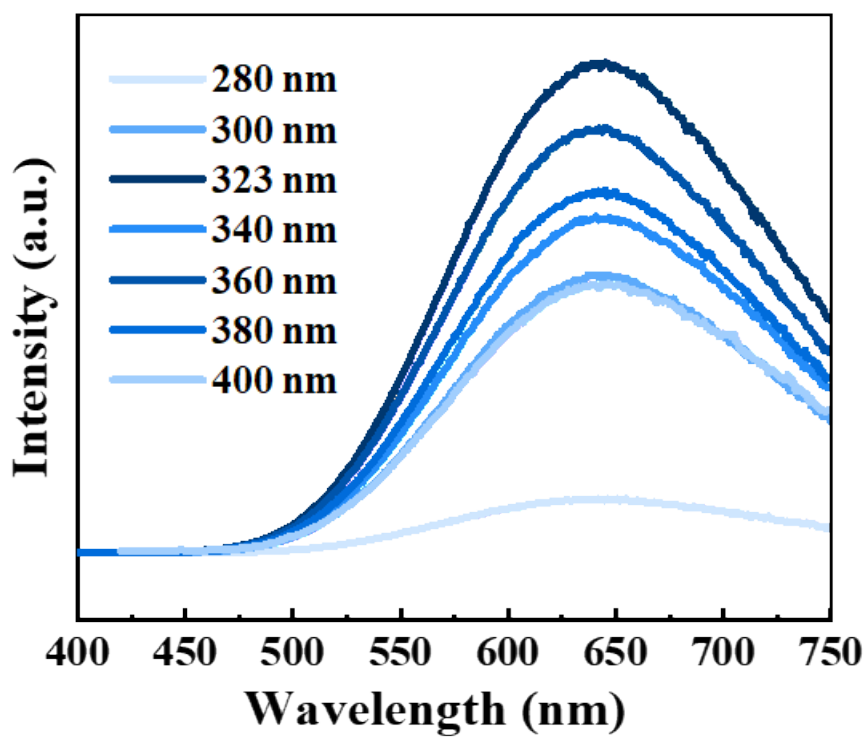

**Figure S6.** PL collected across the broadband emission for  $(\text{C}_{13}\text{H}_{14}\text{N}_3)_3\text{InBr}_6$ .

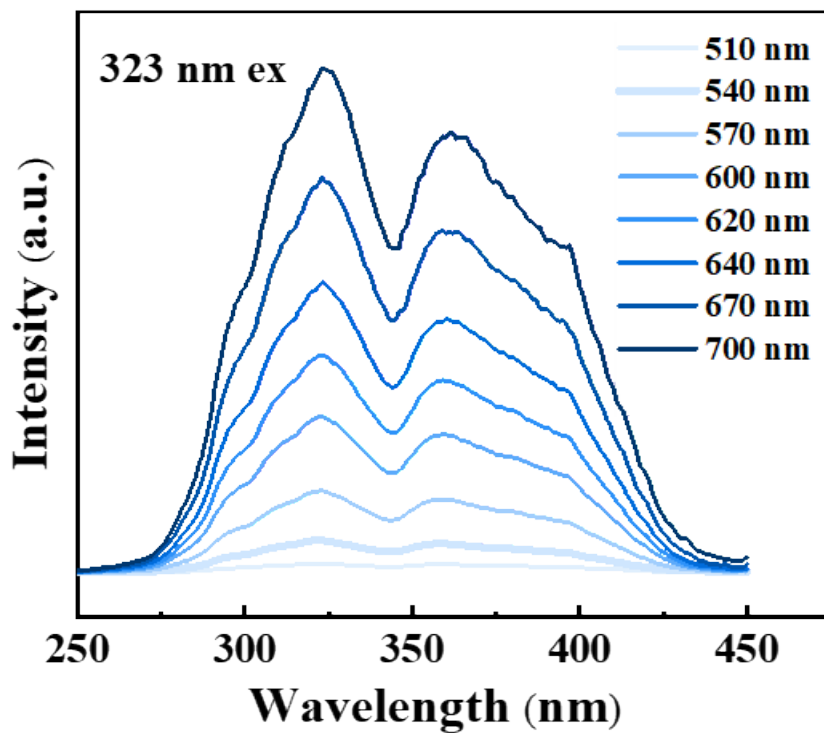

Figure S7. PLE collected across the broadband emission for  $(C_{13}H_{14}N_3)_3InBr_6$ .

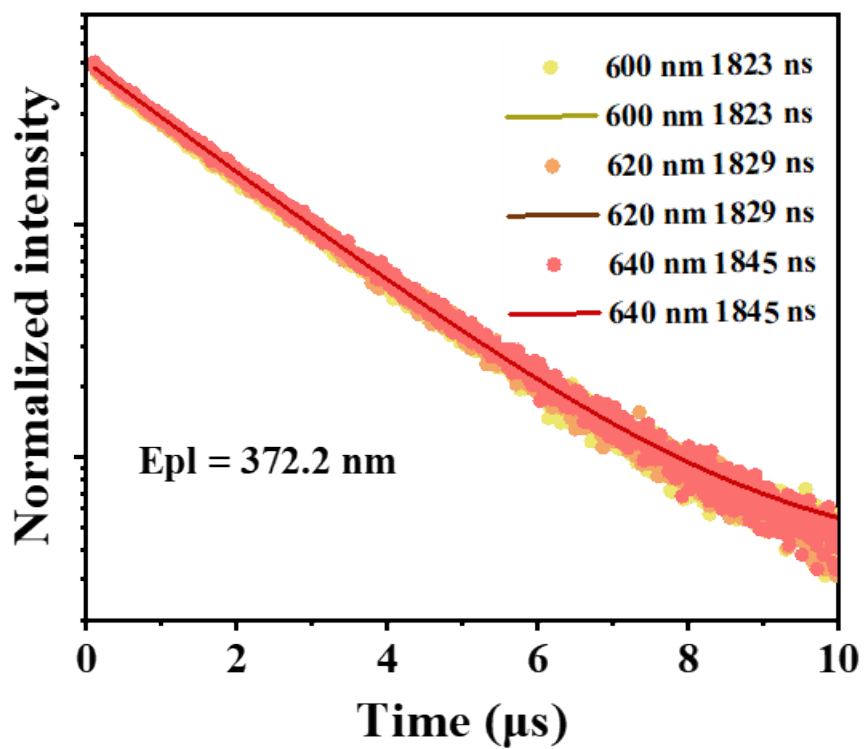



**Figure S8.** Time-resolved PL decay curves of  $(\text{C}_{13}\text{H}_{14}\text{N}_3)_3\text{InBr}_6$  collected across the broadband emission at room temperature.

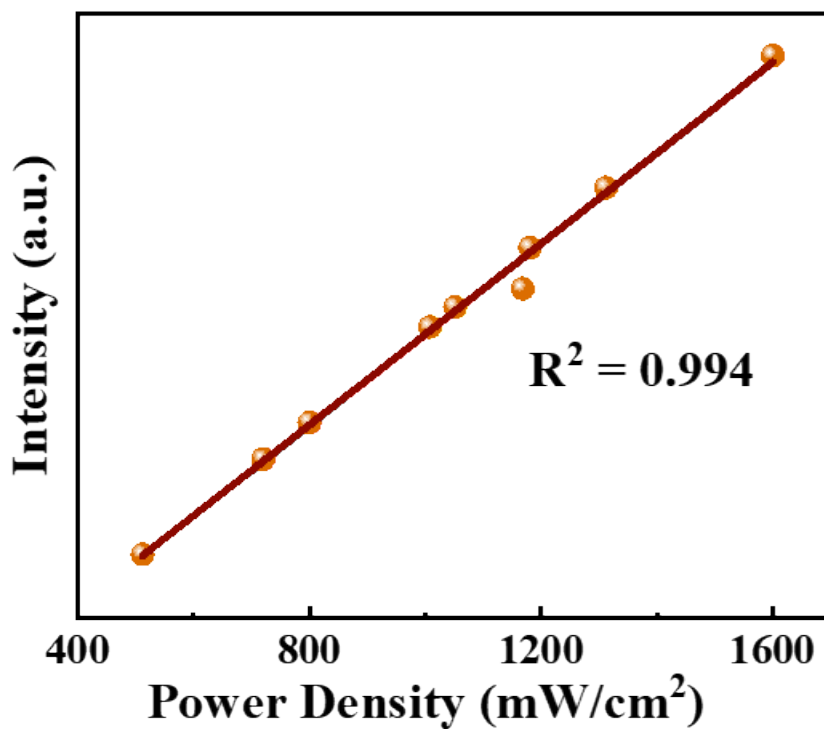

**Figure S9.** Excitation power density dependent PL emission intensity of  $(\text{C}_{13}\text{H}_{14}\text{N}_3)_3\text{InBr}_6$ .

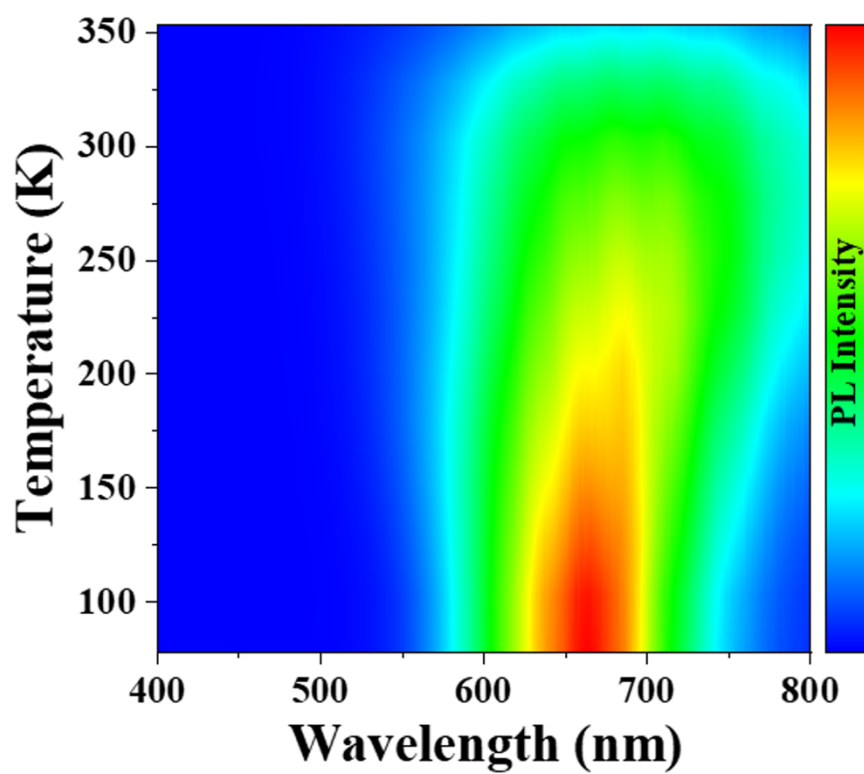

**Figure S10.** Temperature-dependent steady-state emission spectra of  $(\text{C}_{13}\text{H}_{14}\text{N}_3)_3\text{InBr}_6$  crystals excited by 360 nm (78-353 K).

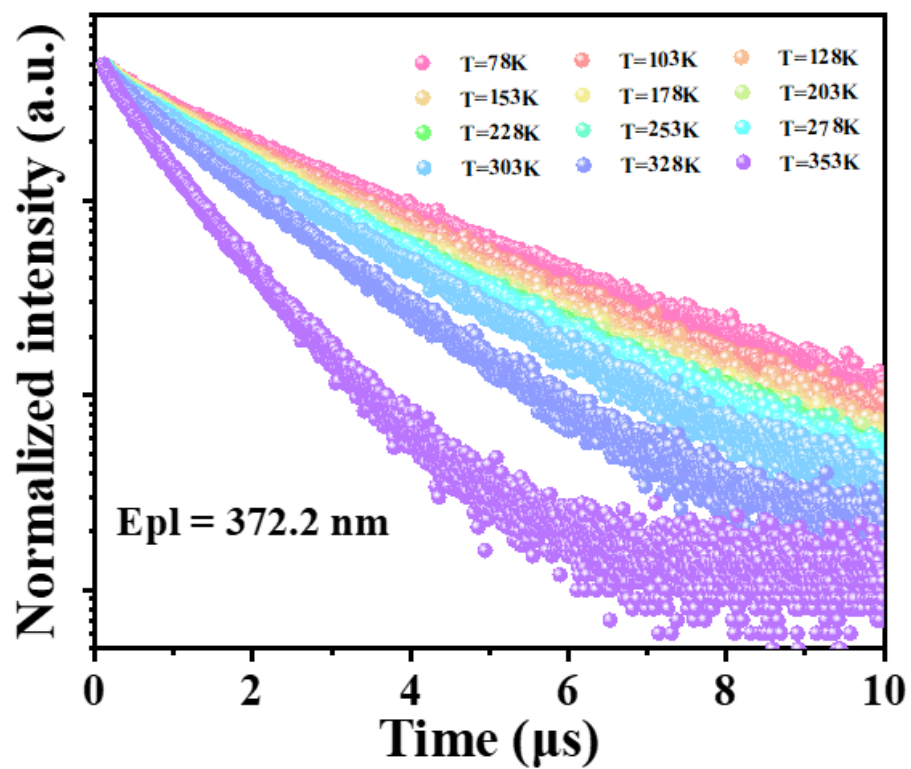

**Figure S11.** Temperature-dependent time-resolved PL decay curves of  $(\text{C}_{13}\text{H}_{14}\text{N}_3)_3\text{InBr}_6$  crystals excited by 372.2 nm (78-353 K)
